# Supplementary material for: When Incorporated into Fruit Sorbet Matrix, Are the Fructans in Natural Raw Materials More Beneficial for Bone Health than Commercial Formulation Added Alone?
Source: MDPI journal article supplement (doi:10.3390/ani12091134), 2022-04-28
Supplement: s1 [file s1]

**Table S1.** The content of growing rat diets (validation model and experimental groups).

| Component<br>(g/kg)                        | Groups of<br>validation model |         | Experimental groups |         |         |        |        |        |
|--------------------------------------------|-------------------------------|---------|---------------------|---------|---------|--------|--------|--------|
|                                            | RC                            | LC      | LC-JA               | LC-Y    | LC-F    | LC-JAS | LC-YS  | LC-FS  |
| corn starch                                | 532.486                       | 532.486 | 428.886             | 432.150 | 452.046 | 146.08 | 139.06 | 131.05 |
| Cellulose                                  | 50.00                         | 50.00   | 31.50               | 28.07   | 50.00   | 23.05  | 19.32  | 50.00  |
| Sucrose                                    | 100.00                        | 100.00  | 77.17               | 10.63   | 91.61   | 44.07  | 0.00   | 0.00   |
| mineral mix                                | 35.00                         | 35.00   | 35.00               | 35.00   | 35.00   | 35.00  | 35.00  | 35.00  |
| Jerusalem<br>artichoke pulp                | -                             | -       | 144.93              | -       | -       | -      | -      | -      |
| yacon root<br>powder                       | -                             | -       | -                   | 211.64  | -       | -      | -      | -      |
| Beneo Orafiti<br>Synergy 1                 | -                             | -       | -                   | -       | 89.83   | -      | -      | -      |
| sorbet with<br>Jerusalem<br>artichoke pulp | -                             | -       | -                   | -       | -       | 470.30 | -      | -      |
| sorbet with<br>yacon root<br>powder        | -                             | -       | -                   | -       | -       | -      | 524.11 | -      |
| sorbet with<br>Beneo Orafiti<br>Synergy1   | -                             | -       | -                   | -       | -       | -      | -      | 511.22 |

RC: diet with recommended calcium dose, LC: low-calcium diet (40% deficiency), LC-JA: low-calcium diet with Jerusalem artichoke pulp, LC-Y: low-calcium diet with yacon root powder, LC-F: low-calcium diet with Beneo Orafiti Synergy 1, LC-JAS: low-calcium diet with sorbet containing Jerusalem artichoke pulp, LC-YS: low-calcium diet with sorbet containing yacon root powder, LC-FS: low-calcium diet with sorbet containing Beneo Orafiti Synergy 1;

Content of casein (200 g/kg), soybean oil (70 g/kg), vitamin mix (10 g/kg), choline bitartate (2.5 g/kg), tert-butylhydroquinone (0.014 g/kg) was the same in all groups.

\*Corn starch was placed in mineral mix instead of calcium
